# Supplementary material for: Proteasome impairment by α-synuclein
Source: PubMed Central journal article supplement (PMC5612461; doi:10.1371/journal.pone.0184040), 2017-09-25
Supplement: pone.0184040.s001.pdf [file pone.0184040.s001.pdf]

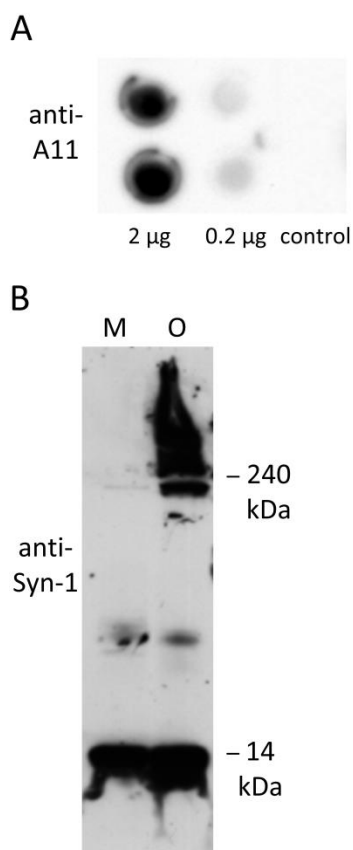

**S1 Fig: Characterisation of recombinant  $\alpha$ -syn preparations**

(A) Dot blot characterisation of  $\alpha$ -syn oligomers produced according to Kaye et al. using the oligomer specific antibody A11 confirms the dose-dependence of  $\alpha$ -syn oligomers in the preparation. (B) The  $\alpha$ -syn preparation produced as described by Snyder et al. comprised monomeric and oligomeric forms of the protein as detected by immunoblotting using an  $\alpha$ -syn specific antibody.
