# Supplementary material for: Proteasome impairment by α-synuclein
Source: PubMed Central journal article supplement (PMC5612461; doi:10.1371/journal.pone.0184040), 2017-09-25
Supplement: pone.0184040.s002.pdf [file pone.0184040.s002.pdf]

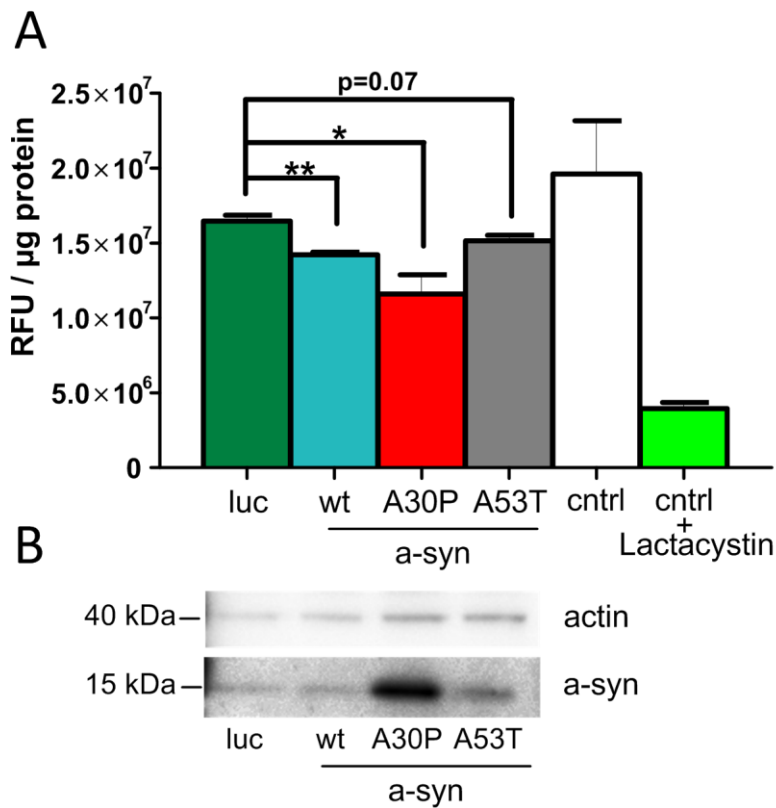

**S2 Fig: Effects of  $\alpha$ -syn expression on 20/26S proteasomal activity in living PC12 cells**

A cellular 20/26S proteasome assay implementing PC12 cells transiently expressing wild-type or A53T  $\alpha$ -syn as well as a control protein (Gussia Luciferase; Luc) was performed to assess the effect of the presence of  $\alpha$ -syn on proteasomal activity on a dopaminergic background. **(A)** Both expression of wild-type and A30P  $\alpha$ -syn results in decreased proteasomal activity as indicated by decreased relative fluorescence intensity (RFU) per  $\mu$ g protein in this setting. Group differences were analyzed applying unpaired t-tests, wild-type  $\alpha$ -syn vs control,  $p=0.006$ ,  $\alpha$ -syn A30P vs control,  $p=0.02$ ,  $\alpha$ -syn A53T vs control,  $p=0.07$ , depicted are the mean  $\pm$  SD,  $n=4$ . **(B)** Immunoblotting of the respective cell lysates using Syn1 and actin antibody.
